# Supplementary material for: Seasonal cycling of zinc and cobalt in the south-eastern Atlantic along the GEOTRACES GA10 section
Source: Copernicus journal article supplement (doi:10.5194/bg-18-4265-2021), 2021-07-21
Supplement: Supplementary file 1 [file bg-18-4265-2021-supplement.pdf]

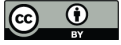

*Supplement of*

## **Seasonal cycling of zinc and cobalt in the south-eastern Atlantic along the GEOTRACES GA10 section**

**Neil J. Wyatt et al.**

*Correspondence to:* Neil J. Wyatt ([n.j.wyatt@soton.ac.uk](mailto:n.j.wyatt@soton.ac.uk))

The copyright of individual parts of the supplement might differ from the article licence.

Supplement Table S1. Regression lines as depicted in Figure 4. SAMW was identified by Si\* (Sarmiento et al., 2004) with underlying AAIW located between 500 and 1750 m. Concentrations of dissolved Zn and Co are in nM and PO<sub>4</sub><sup>3-</sup> in μM. SAMW = Sub-Antarctic Mode Water, AAIW = Antarctic Intermediate Water.

| Water mass | Transect     | Equation<br>dZn-PO <sub>4</sub> <sup>3-</sup> relationship | R <sup>2</sup> | n  |
|------------|--------------|------------------------------------------------------------|----------------|----|
| SAMW       | Early spring | dZn = 1.4 * PO <sub>4</sub> <sup>3-</sup> - 1.0            | 0.39           | 27 |
|            | Late spring  | dZn = 1.4 * PO <sub>4</sub> <sup>3-</sup> - 0.8            | 0.67           | 44 |
|            | Summer       | dZn = 1.1 * PO <sub>4</sub> <sup>3-</sup> - 0.7            | 0.54           | 30 |
| AAIW       | Early spring | dZn = 5.8 * PO <sub>4</sub> <sup>3-</sup> - 9.1            | 0.65           | 40 |
|            | Late spring  | dZn = 4.4 * PO <sub>4</sub> <sup>3-</sup> - 6.1            | 0.60           | 21 |
|            | Summer       | dZn = 5.9 * PO <sub>4</sub> <sup>3-</sup> - 9.4            | 0.43           | 19 |

| Water mass | Transect     | Equation<br>dCo-PO <sub>4</sub> <sup>3-</sup> relationship | R <sup>2</sup> | n  |
|------------|--------------|------------------------------------------------------------|----------------|----|
| SAMW+AAIW  | Early spring | dCo = 12.6 * PO <sub>4</sub> <sup>3-</sup> + 28.4          | 0.42           | 55 |
|            | Late spring  | dCo = 15.4 * PO <sub>4</sub> <sup>3-</sup> + 17.3          | 0.67           | 56 |
|            | Summer       | dCo = 11.4 * PO <sub>4</sub> <sup>3-</sup> + 30.2          | 0.49           | 36 |

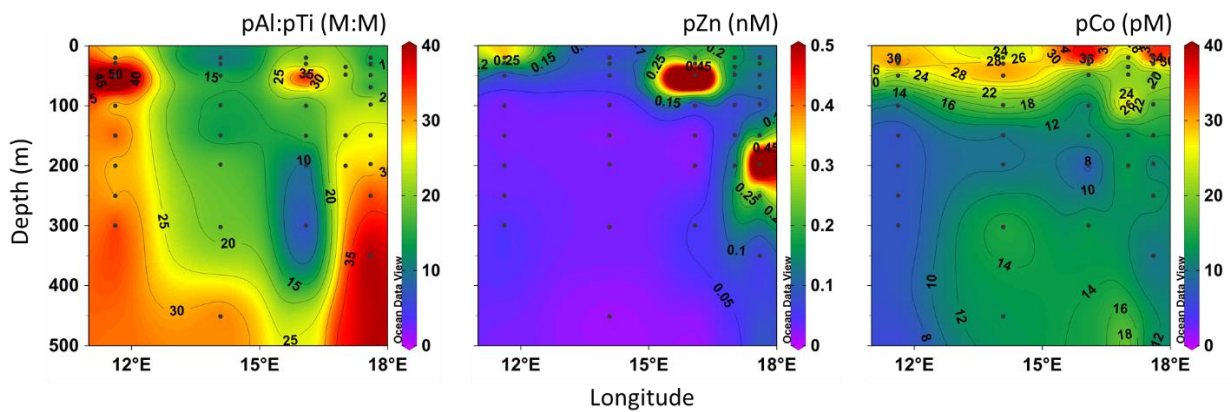

Supplement Figure S1. Upper 500 m distribution of particulate Al:Ti ratio alongside particulate Zn and Co between 11 and 18°E during the late spring (D357-2).

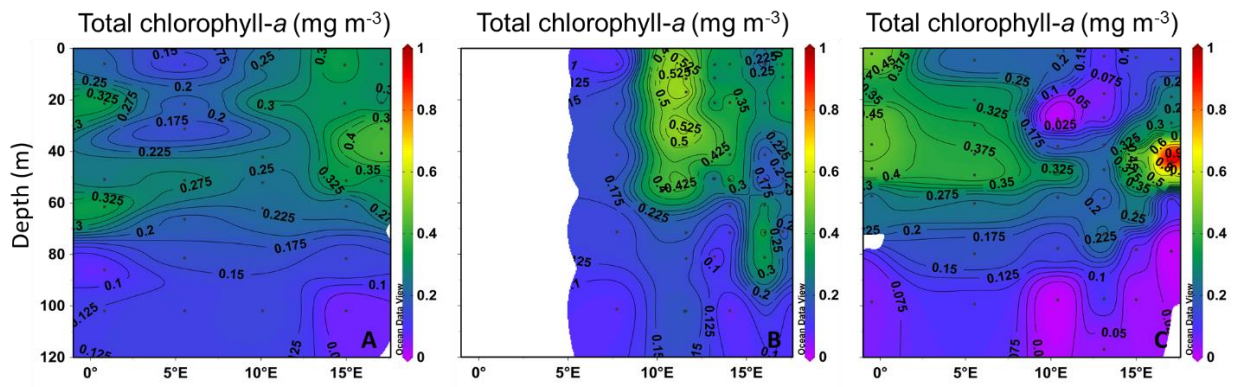

Supplement Figure S2. Upper 50 m distributions of total chlorophyll-*a* during the early spring (A; D357-1), late spring (B; D357-2) and summer (C; JC068) transects.
